# Supplementary material for: Genetic Engineering of Lesquerella with Increased Ricinoleic Acid Content in Seed Oil
Source: MDPI journal article supplement (doi:10.3390/plants10061093), 2021-05-29
Supplement: s1 [file s1]

Table S1. Estimated number of *transgene* locus for each transgenic line (T<sub>1</sub> seeds).

| T <sub>1</sub><br>seeds | number of seedlings |                    | Estimated transgenic<br>locus number |
|-------------------------|---------------------|--------------------|--------------------------------------|
|                         | Basta <sup>R</sup>  | Basta <sup>S</sup> |                                      |
| 1                       | 47                  | 3                  | 2                                    |
| 2                       | 45                  | 3                  | 2                                    |
| 3                       | 44                  | 3                  | 2                                    |
| 4                       | 46                  | 3                  | 2                                    |
| 5                       | 46                  | 3                  | 2                                    |
| 6                       | 50                  | 0                  | >2                                   |
| 7                       | 36                  | 11                 | 1                                    |
| 8                       | 47                  | 3                  | 2                                    |
| 9                       | 47                  | 3                  | 2                                    |
| 10                      | 37                  | 12                 | 1                                    |
| 11                      | 45                  | 3                  | 2                                    |
| 12                      | 46                  | 3                  | 2                                    |
| 13                      | 36                  | 12                 | 1                                    |
| 14                      | 47                  | 3                  | 2                                    |
| 15                      | 38                  | 11                 | 1                                    |
| 16                      | 35                  | 10                 | 1                                    |

Seeds were germinated on germination medium containing Basta at 1mg/l for 3 weeks. R, resistance seedlings showing normal developed with healthy cotyledons and 2-4 true leaves. S, sensitive seedlings showing arrested development with yellow cotyledons and no true leaf.

Table S2. Fatty acid composition (mole %) in T<sub>1</sub> seeds expressing *AtFAD3 RNAi* + *CsFAE1 RNAi*

| Line                   | 16:0      | 16:1      | 18:0      | 20:0      | 20:1      |
|------------------------|-----------|-----------|-----------|-----------|-----------|
| wild-type              | 1.7 ± 0.2 | 0.6 ± 0.1 | 1.5 ± 0.3 | 0.1 ± 0.0 | 0.7 ± 0.1 |
| line 1                 | 1.9 ± 0.2 | 0.3 ± 0.1 | 1.2 ± 0.3 | 0.2 ± 0.1 | 0.7 ± 0.1 |
| line 2                 | 2.2 ± 0.1 | 0.6 ± 0.1 | 1.7 ± 0.0 | 0.3 ± 0.0 | 0.5 ± 0.1 |
| line 3                 | 2.0 ± 0.1 | 0.5 ± 0.0 | 1.5 ± 0.1 | 0.2 ± 0.0 | 0.7 ± 0.1 |
| line 4                 | 2.0 ± 0.2 | 0.5 ± 0.0 | 1.2 ± 0.1 | 0.2 ± 0.0 | 0.8 ± 0.1 |
| line 5                 | 1.9 ± 0.1 | 0.7 ± 0.1 | 1.3 ± 0.0 | 0.2 ± 0.1 | 0.7 ± 0.1 |
| line 6                 | 1.8 ± 0.1 | 0.5 ± 0.1 | 1.2 ± 0.1 | 0.2 ± 0.0 | 0.5 ± 0.1 |
| line 7                 | 1.6 ± 0.1 | 0.5 ± 0.1 | 1.1 ± 0.0 | 0.2 ± 0.1 | 0.7 ± 0.1 |
| line 8                 | 1.8 ± 0.1 | 0.5 ± 0.1 | 1.4 ± 0.0 | 0.2 ± 0.1 | 0.8 ± 0.1 |
| line 9                 | 1.9 ± 0.1 | 0.6 ± 0.0 | 1.2 ± 0.1 | 0.2 ± 0.0 | 0.6 ± 0.1 |
| line 10                | 1.8 ± 0.1 | 0.5 ± 0.1 | 1.6 ± 0.1 | 0.2 ± 0.1 | 0.8 ± 0.1 |
| line 11                | 1.7 ± 0.1 | 0.5 ± 0.1 | 1.3 ± 0.1 | 0.1 ± 0.0 | 0.7 ± 0.1 |
| line 12                | 1.8 ± 0.1 | 0.5 ± 0.1 | 1.4 ± 0.0 | 0.2 ± 0.1 | 0.8 ± 0.1 |
| line 13                | 1.4 ± 0.2 | 0.4 ± 0.1 | 1.2 ± 0.1 | 0.1 ± 0.1 | 0.7 ± 0.1 |
| line 14                | 1.6 ± 0.2 | 0.5 ± 0.1 | 1.4 ± 0.0 | 0.2 ± 0.1 | 0.7 ± 0.1 |
| line 15                | 1.3 ± 0.2 | 0.5 ± 0.1 | 1.3 ± 0.1 | 0.1 ± 0.0 | 0.8 ± 0.1 |
| line 16                | 1.5 ± 0.1 | 0.5 ± 0.1 | 1.3 ± 0.0 | 0.1 ± 0.1 | 0.6 ± 0.0 |
| average of transgenics | 1.7 ± 0.2 | 0.5 ± 0.1 | 1.3 ± 0.1 | 0.2 ± 0.0 | 0.1 ± 0.1 |

Three or four replicates of 30-seed sample were measured for wild-type and each transgenic line. All data are averages of measurements ±SD. Fatty acid legend: 16:0 is palmitic, 16:1 is palmitoleic, 18:0 is stearic, 18:1 is oleic, 20:0 is arachidic, and 20:1 is eicosenoic acids.

Table S3. Fatty acid composition (mole %) in T<sub>1</sub> seeds expressing *CsFAD2 RNAi* + *AtFAD3 RNAi* + *CsFAEI RNAi*

| Line                   | 16:0      | 16:1      | 18:0      | 20:0      | 20:1      |
|------------------------|-----------|-----------|-----------|-----------|-----------|
| wild-type              | 1.6 ± 0.2 | 0.6 ± 0.1 | 1.3 ± 0.1 | 0.1 ± 0.0 | 0.6 ± 0.1 |
| line 1                 | 1.8 ± 0.0 | 0.6 ± 0.0 | 1.0 ± 0.0 | 0.1 ± 0.0 | 0.6 ± 0.0 |
| line 2                 | 1.8 ± 0.0 | 0.6 ± 0.0 | 0.9 ± 0.1 | 0.1 ± 0.0 | 0.5 ± 0.0 |
| line 3                 | 2.0 ± 0.0 | 0.8 ± 0.0 | 1.0 ± 0.1 | 0.2 ± 0.0 | 0.6 ± 0.1 |
| line 4                 | 1.7 ± 0.1 | 0.4 ± 0.1 | 1.0 ± 0.2 | 0.1 ± 0.0 | 0.6 ± 0.0 |
| line 5                 | 2.1 ± 0.1 | 1.0 ± 0.0 | 1.0 ± 0.0 | 0.2 ± 0.0 | 0.6 ± 0.0 |
| line 6                 | 1.8 ± 0.1 | 0.6 ± 0.1 | 0.9 ± 0.1 | 0.2 ± 0.0 | 0.6 ± 0.1 |
| line 7                 | 1.8 ± 0.1 | 0.5 ± 0.1 | 1.0 ± 0.1 | 0.1 ± 0.0 | 0.5 ± 0.0 |
| line 8                 | 1.8 ± 0.1 | 0.8 ± 0.1 | 0.8 ± 0.0 | 0.2 ± 0.0 | 0.6 ± 0.0 |
| line 9                 | 1.6 ± 0.1 | 0.5 ± 0.1 | 1.0 ± 0.0 | 0.1 ± 0.0 | 0.6 ± 0.0 |
| line 10                | 1.7 ± 0.2 | 0.6 ± 0.1 | 1.0 ± 0.0 | 0.2 ± 0.0 | 0.6 ± 0.0 |
| line 11                | 1.7 ± 0.1 | 0.6 ± 0.2 | 1.3 ± 0.1 | 0.2 ± 0.0 | 0.5 ± 0.0 |
| line 12                | 1.6 ± 0.1 | 0.5 ± 0.0 | 1.0 ± 0.1 | 0.1 ± 0.0 | 0.6 ± 0.0 |
| line 13                | 1.4 ± 0.1 | 0.6 ± 0.1 | 1.2 ± 0.0 | 0.2 ± 0.0 | 0.6 ± 0.0 |
| line 14                | 1.6 ± 0.2 | 0.5 ± 0.1 | 1.4 ± 0.0 | 0.2 ± 0.1 | 0.7 ± 0.1 |
| line 15                | 1.3 ± 0.1 | 0.5 ± 0.1 | 1.3 ± 0.0 | 0.1 ± 0.0 | 0.7 ± 0.0 |
| average of transgenics | 1.7 ± 0.2 | 0.6 ± 0.1 | 1.0 ± 0.1 | 0.1 ± 0.0 | 0.6 ± 0.0 |

Triplicates of 30-seed sample were measured for wild-type and each transgenic line. All data are averages of measurements ±SD. Fatty acid legend: 16:0 is palmitic, 16:1 is palmitoleic, 18:0 is stearic, 18:1 is oleic, 20:0 is arachidic, and 20:1 is eicosenoic acids.

Table S4. Correlations between the fatty acids among transgenic lines

| FA     | FA     | T <sub>1</sub> <i>FAE1i+FAD3i</i> <sup>a</sup> | T <sub>2</sub> <i>FAE1i+FAD3i</i> <sup>b</sup> | T <sub>1</sub> <i>FAE1i+FAD3i+FAD2i</i> <sup>c</sup> |
|--------|--------|------------------------------------------------|------------------------------------------------|------------------------------------------------------|
| 18:1   | 18:2   | 0.33                                           | 0.02                                           | -0.38                                                |
| 18:1   | 18:3   | -0.60**                                        | -0.25                                          | -0.19                                                |
| 18:1   | 18:1OH | 0.93***                                        | 0.71***                                        | 0.15                                                 |
| 18:1   | 20:1OH | -0.97***                                       | -0.85***                                       | -0.75***                                             |
| 18:1   | 20:2OH | -0.66**                                        | -0.05                                          | -0.19                                                |
| 18:1   | tHFA   | -0.98***                                       | -0.82***                                       | -0.98***                                             |
| 18:2   | 18:3   | -0.92***                                       | -0.83***                                       | -0.67***                                             |
| 18:2   | 18:1OH | 0.35                                           | 0.10                                           | -0.03                                                |
| 18:2   | 20:1OH | -0.29                                          | -0.15                                          | 0.33                                                 |
| 18:2   | 20:2OH | -0.86***                                       | -0.53***                                       | -0.70**                                              |
| 18:2   | tHFA   | -0.28                                          | -0.37**                                        | 0.38*                                                |
| 18:3   | 18:1OH | -0.58*                                         | -0.33*                                         | 0.03                                                 |
| 18:3   | 20:1OH | 0.53*                                          | 0.29**                                         | 0.04                                                 |
| 18:3   | 20:2OH | 0.91***                                        | 0.45***                                        | 0.91***                                              |
| 18:3   | tHFA   | 0.51*                                          | 0.27                                           | 0.17                                                 |
| 18:1OH | 20:1OH | -0.99***                                       | -0.94***                                       | -0.75**                                              |
| 18:1OH | 20:2OH | -0.62**                                        | 0.06                                           | 0.11                                                 |
| 18:1OH | tHFA   | -0.90***                                       | -0.49***                                       | -0.12                                                |
| 20:1OH | 20:2OH | 0.60*                                          | -0.09                                          | 0.00                                                 |
| 20:1OH | tHFA   | 0.96***                                        | 0.75***                                        | 0.78***                                              |
| 20:2OH | tHFA   | 0.62*                                          | 0.22                                           | 0.19                                                 |

tHFA, total HFA. Total number of transgenic lines (or sample size) were included in calculation for a, n = 16; for b, n = 47; and for c, n = 15. \*,  $p < 0.05$ ; \*\*,  $p < 0.01$ ; \*\*\*,  $p < 0.001$ .
